# Supplementary material for: Clinical Value of Virtual Reality versus 3D Printing in Congenital Heart Disease
Source: MDPI journal article supplement (doi:10.3390/biom11060884), 2021-06-14
Supplement: s1 [file s1]

### Supplementary File 3: Images of 3D Printed Heart Models

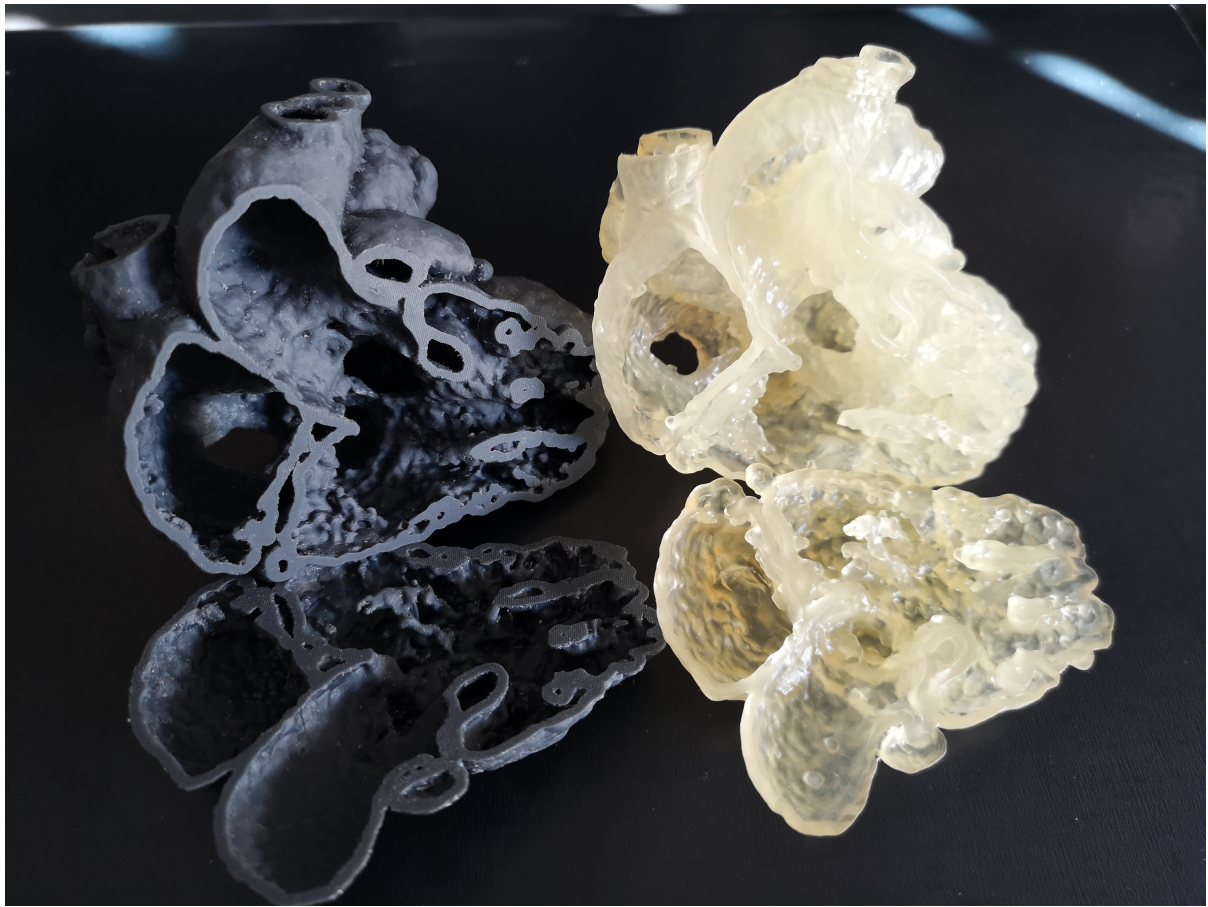

**Figure 1:** 3D printed heart models in two different materials, Flexible V4 Resin (gray) and TPU 80A (translucent).

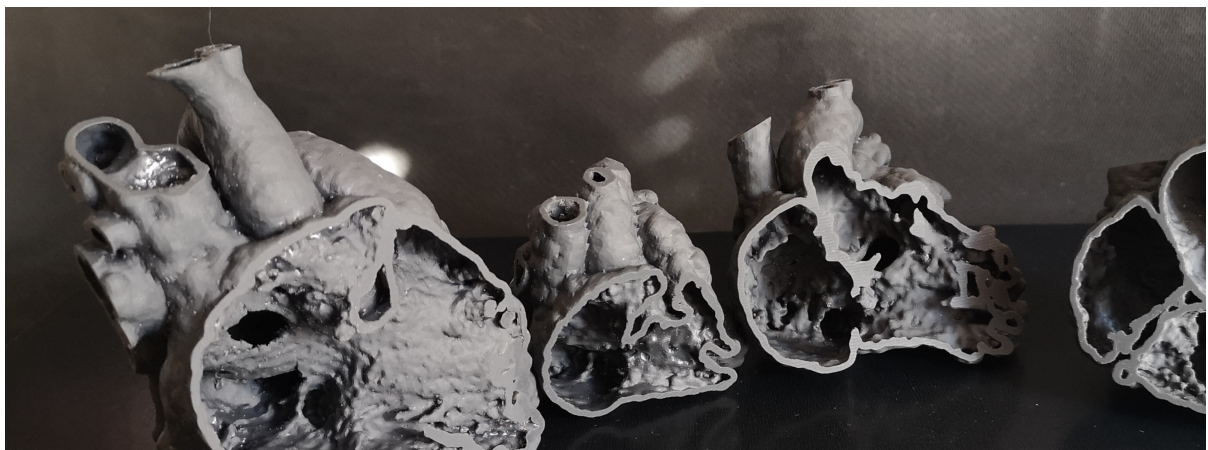

**Figure 2:** 3D printed heart models of 4 different types of congenital heart disease. Starting from left: atrial septal defect, ventricular septal defect, Tetralogy of Fallot, double outlet right ventricle.
